# Supplementary material
Source: PubMed Central journal article supplement (PMC4151773)
Supplement: 111.34.12273_pnas.201414226SI.pdf [file 111.34.12273_pnas.201414226SI.pdf]

# Supporting Information

Rappuoli 10.1073/pnas.1414226111

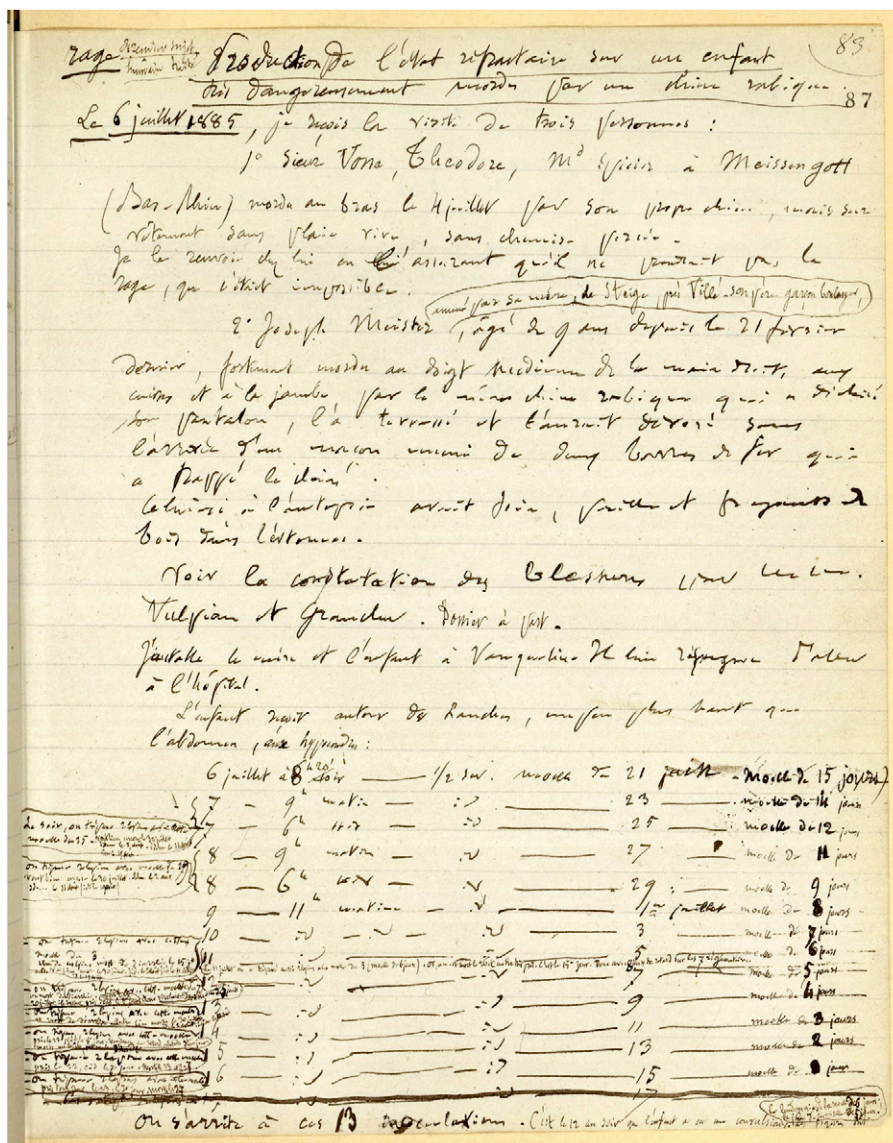

Fig. S1. This page from Louis Pasteur's notebook records the first vaccination of a human against rabies. The following text is a translation of the notes at the top of the page:

Translation:

Report on an infant who was dangerously bitten by a rabid dog.

6 July 1885. I received the visit of three persons:

1st Mr. Vone, Theodore, a spice merchant at Meissegott. .bitten on his arm on 4 July by his rabid dog. .2nd Joseph Meister aged 9. .was heavily bitten by the same rabid dog. .

Image courtesy of Bibliothèque nationale de France.
